# Supplementary material for: Immunodominant antigens that induce Th1 and Th17 responses protect mice against Helicobacter pylori infection
Source: PubMed Central journal article supplement (PMC5844728; doi:10.18632/oncotarget.23927), 2018-01-03
Supplement: oncotarget-09-12050-s001.pdf [file oncotarget-09-12050-s001.pdf]

## Immunodominant antigens that induce Th1 and Th17 responses protect mice against *Helicobacter pylori* infection

### SUPPLEMENTARY MATERIALS

**Supplementary Table 1: Purity of proteins**

| NO. | Protein                                      | MW [kDa] | Purity[%] | Endotoxin |
|-----|----------------------------------------------|----------|-----------|-----------|
| P1  | chaperonin GroEL                             | 58.29    | 95.5      | negative  |
| P2  | elongation factor Tu                         | 43.59    | 91.0      | negative  |
| P3  | GTP-binding protein TypA                     | 66.68    | 88.1      | negative  |
| P4  | hydantoin utilization protein A              | 78.42    | 90.6      | negative  |
| P5  | inosine 5'-monophosphate dehydrogenase IMPDH | 51.80    | 89.8      | negative  |
| P6  | leucyl aminopeptidase                        | 54.53    | 91.3      | negative  |
| P7  | methyl-accepting chemotaxis protein McpA     | 48.38    | 94.3      | negative  |
| P8  | molecular chaperone DnaK                     | 67.05    | 94.8      | negative  |
| P9  | protease DO                                  | 51.60    | 91.7      | negative  |
| P10 | type II citrate synthase CS II               | 48.32    | 88.5      | negative  |
| P11 | urease subunit beta UreB                     | 61.55    | 98.2      | negative  |

The purity of these proteins was determined by SDS-PAGE and high-performance liquid chromatography (HPLC). The endotoxin content was detected by the tachypleus amoebocyte lysate test. Endotoxin in the recombinant protein was determined to be negative, lower than 10 EU/mg (Endotoxin Unit).

**Supplementary Table 2: Primers used for amplifying the target genes of the proteins and corresponding restriction sites**

| NO. | Protein                                         | Sense Primer                              | Anti-sense Primer                          | Restriction Sites |        |
|-----|-------------------------------------------------|-------------------------------------------|--------------------------------------------|-------------------|--------|
| P1  | chaperonin GroEL                                | 5'-CGCGGATCCATGGCA<br>AAAGAAATCAAAT-3'    | 5'-CCGGAATTCTTAATCAGGCATTGCTGGG-3'         | BamH I            | EcoR I |
| P2  | elongation factor Tu                            | 5'-CGCGGATCCATGGCAAAAGAAAAG-3'            | 5'-CCGGAATTCTTATTCAATAATATGCTC<br>ACAAC-3' | BamH I            | EcoR I |
| P3  | GTP-binding protein TypA                        | 5'-CGCGGATCCATGAAAAATA<br>TTAGAAATATCG-3' | 5'-CCGCTCGAGTTATTTTTTCGCCCTT-3'            | BamH I            | Xho I  |
| P4  | hydantoin utilization<br>protein A              | 5'-CGCGGATCCATGAAAGACGCAAAAG-3'           | 5'-CCGGAATTCTTATTAATTC<br>TTCAAGTGGAAC-3'  | BamH I            | Xho I  |
| P5  | inosine 5'-monophosphate<br>dehydrogenase IMPDH | 5'-CCGGAATTCATGAGAATTT<br>TACAAAGGGCT-3'  | 5'-CCGCTCGAGTTACCCATAATAATTAGGGGC-3'       | EcoR I            | Xho I  |
| P6  | leucyl aminopeptidase                           | 5'-CGCGGATCCATGTTGAAAATCAAAT-3'           | 5'-CCGCTCGAGTTAAGCCTTTTTCAAAAATT-3'        | BamH I            | Xho I  |
| P7  | methyl-accepting<br>chemotaxis protein McpA     | Whole gene synthesis                      |                                            | BamH I            | EcoR I |
| P8  | molecular chaperone DnaK                        | 5'-CGCGGATCCATGGGAAAAGTTATTG-3'           | 5'-CCGGAATTCTTACTCCACTTCCGCAT-3'           | BamH I            | EcoR I |
| P9  | protease DO                                     | 5'-CGCGGATCCATGATGAAAAAAC-3'              | 5'-CCGGAATTCTTATTCACCAAATGATCC-3'          | BamH I            | EcoR I |
| P10 | type II citrate synthase<br>CS II               | 5'-CGCGGATCCATGTCTGTTACTTTA-3'            | 5'-CCGGAATTCTTAATCCCCTACATAG-3'            | BamH I            | EcoR I |
| P11 | urease subunit beta UreB                        | Whole gene synthesis                      |                                            | EcoR I            | Xho I  |

The target genes of the proteins P1-P6, P8-P10 were amplified by performing PCR from *H. pylori* DNA, with the primers above. The genes of P7 and P11 were synthesized by Sangon Biotech (Shanghai, China). The pGEX-6P-1 expression plasmid was used as a vector plasmid. The target genes of the proteins were inserted into pGEX-6P-1 in the restriction sites shown above.
